# Supplementary material for: Polymorphs and hydrates of Etoricoxib, a selective COX-2 inhibitor
Source: Royal Society of Chemistry journal article supplement (doi:10.1039/c2ce06604a), 2012-01-01

## Polymorphs and hydrates of Etoricoxib, a selective COX-2 inhibitor

Pawel Grobelny<sup>†</sup>, Arijit Mukherjee and Gautam R. Desiraju<sup>\*</sup>

<sup>1</sup>Solid State and Structural Chemistry Unit, Indian Institute of Science, Bangalore 560 012, India, <sup>†</sup>At Present: School of Pharmacy, University of Connecticut, Storrs, Connecticut 06269

USA

Fax: +91 80 23602306; Tel: +91 80 22933311; E-mail: desiraju@sscu.iisc.ernet.in

### Electronic Supplementary Information

#### Contents

|           |                                                                                                                  |          |
|-----------|------------------------------------------------------------------------------------------------------------------|----------|
| <b>1.</b> | ORTEP diagrams of hemihydrates I and II                                                                          | <b>2</b> |
| <b>2.</b> | Comparison of PXRD patterns reported in patents with simulated patterns generated from single crystal structures | <b>3</b> |
| <b>3.</b> | TGA plots for Form I and form IV                                                                                 | <b>5</b> |
| <b>4.</b> | Hydrogen Bonding Table                                                                                           | <b>6</b> |
| <b>5.</b> | Distance range observed in aromatic sulfone and aromatic C–H interaction in CSD analysis                         | <b>7</b> |
| <b>5.</b> | Difference map for locating water hydrogen atoms in hemihydrate II                                               | <b>8</b> |

## 1. ORTEP Diagrams of hemihydrate polymorphs

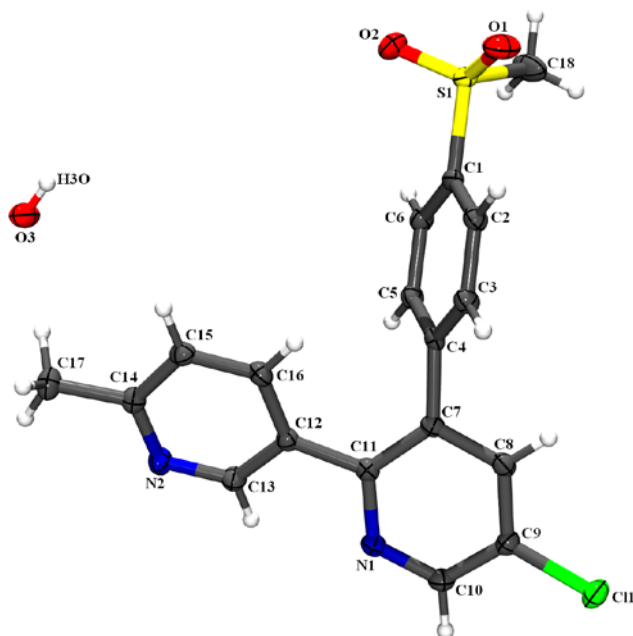

**Fig. S1.1** Thermal ellipsoid diagram of hemihydrate **I** at 50% probability

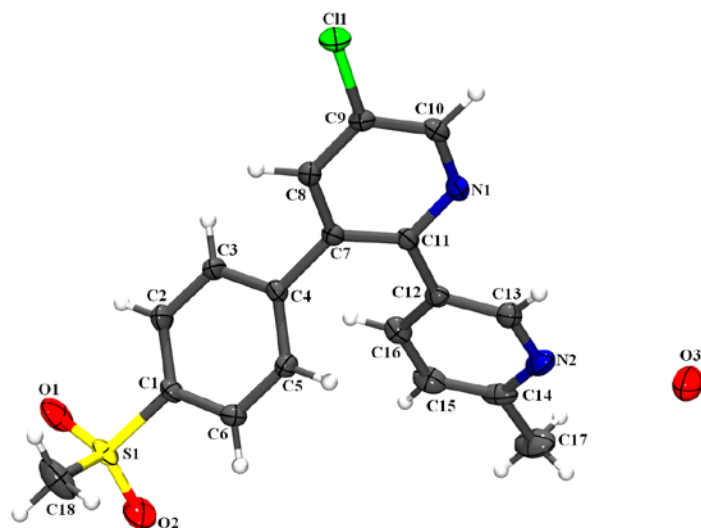

**Fig. S1.2** Thermal ellipsoid diagram of hemihydrate **II** at 50% probability

## 2. Comparison of PXRD patterns reported in patents with simulated patterns generated from single crystal structures

### Form IV

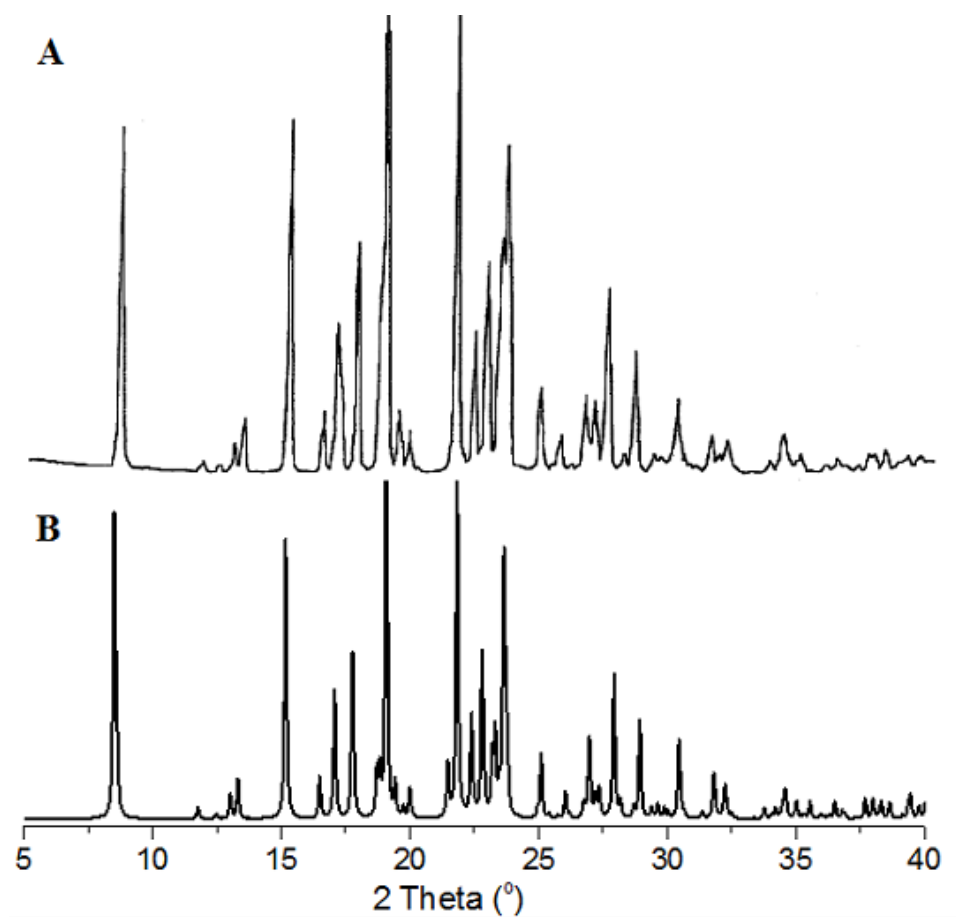

**Fig. S2.1.** PXRD patterns of form IV; patent (A) and that generated from the single crystal structure (B)

### Hemihydrate I

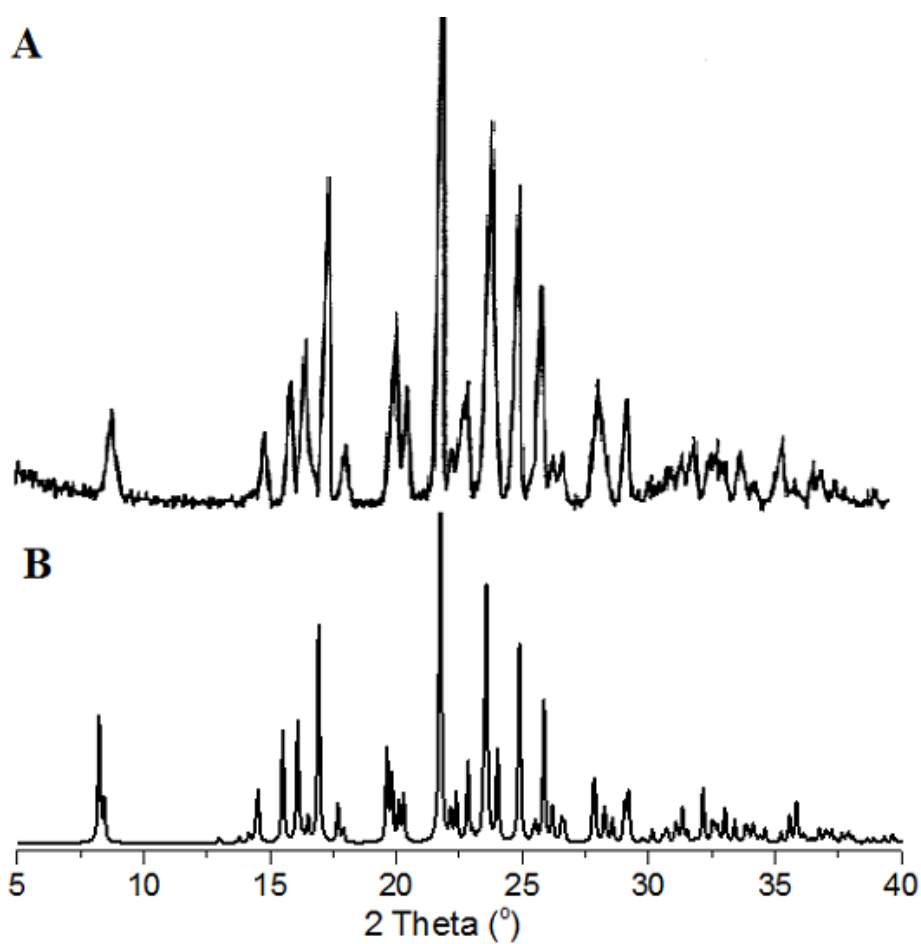

**Fig. S2.2.** PXRD patterns of Hemihydrate I; patent (A) and that generated from the single crystal structure (B)

### **Hemihydrate II**

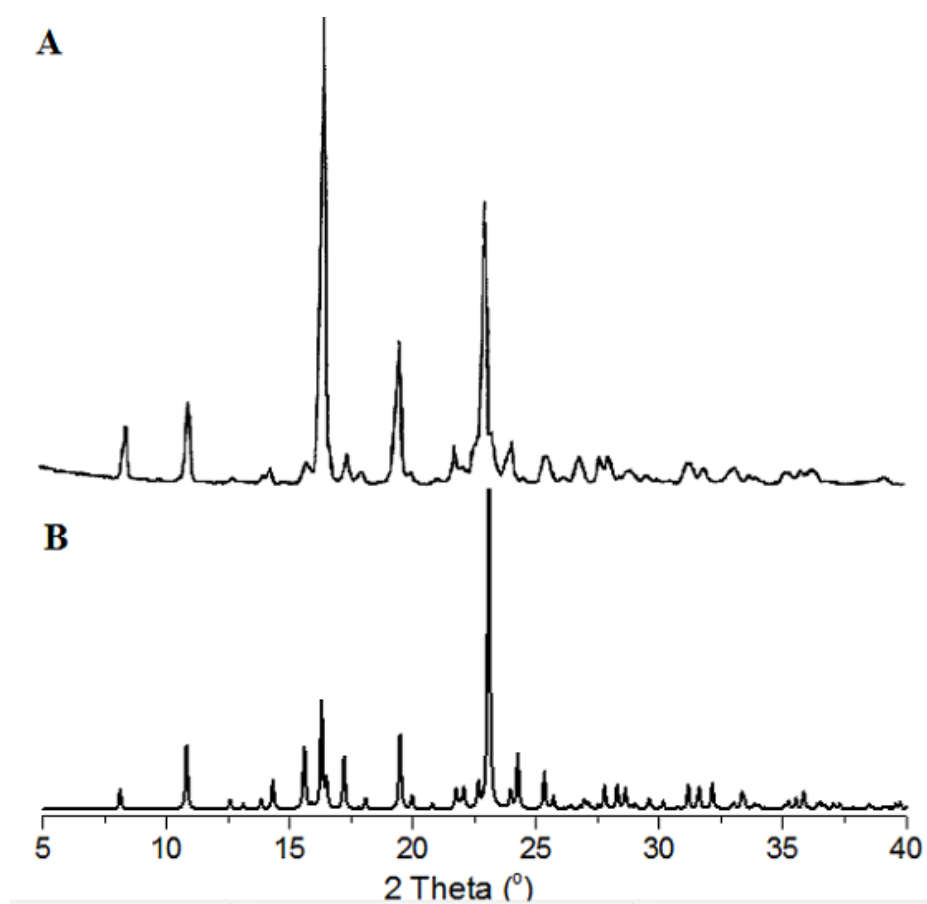

**Fig. S2.3.** (A) PXRD patterns of Form III in patent and (B) simulated PXRD pattern for hemihydrate II generated from the single crystal structure.

### 3. TGA plots for Form I and form IV

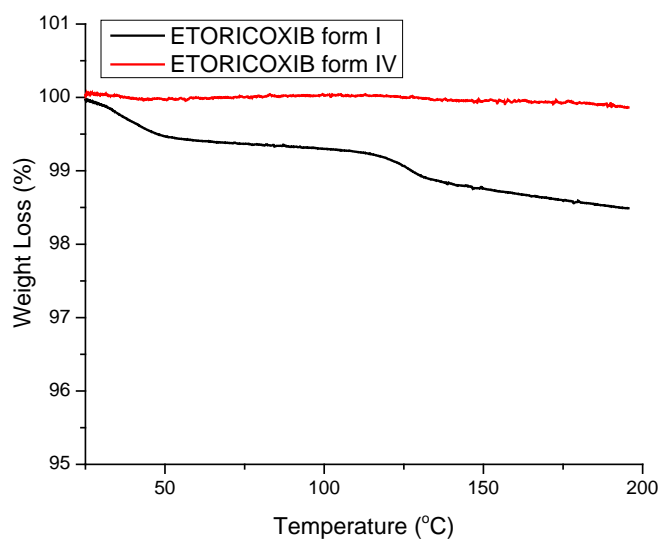

#### 4. Hydrogen Bonding Table with normalized H-atom Positions<sup>†</sup>

|                  | D-H...A       | Symmetry code       | D-H           | H...A | D-H...A |
|------------------|---------------|---------------------|---------------|-------|---------|
| Form I           | C2-H2...O1    | .                   | 1.09          | 2.43  | 103     |
|                  | C5-H5...N1    | x, -1+y, z          | 1.09          | 2.55  | 156     |
|                  | C8-H8...O4    | .                   | 1.09          | 2.26  | 165     |
|                  | C10-H10...O2  | 1/2-x, -1+y, -1/2+z | 1.09          | 2.28  | 162     |
|                  | C13-H13...Cl2 | 1/2-x, -1+y, -1/2+z | 1.09          | 2.74  | 137     |
|                  | C17-H17B...O3 | -1/2+x, 1-y, z      | 1.09          | 2.58  | 140     |
|                  | C18-H18B...O1 | x, -1+y, z          | 1.09          | 2.59  | 125     |
|                  | C21-H21...N4  | x, 1+y, z           | 1.09          | 2.54  | 156     |
|                  | C24-H24...O4  | .                   | 1.09          | 2.47  | 102     |
|                  | C26-H26...O1  | .                   | 1.09          | 2.30  | 168     |
|                  | C28-H28...O3  | 1-x, 1-y, 1/2+z     | 1.09          | 2.36  | 139     |
|                  | C35-H35B...O2 | 1/2+x, 1-y, z       | 1.09          | 2.40  | 162     |
|                  | C36-H36C...N3 | 1-x, 1-y, -1/2+z    | 1.09          | 2.44  | 143     |
|                  | Form IV       | C1-H1...N1          | 3-x, 1-y, 2-z | 1.09  | 2.54    |
| C3-H3...O1       |               | 1-x, 2-y, 2-z       | 1.09          | 2.51  | 136     |
| C7-H7...O1       |               | 1+x, y, z           | 1.09          | 2.23  | 169     |
| C10-H10...O1     |               | .                   | 1.09          | 2.52  | 101     |
| C12-H12C...O2    |               | 1-x, 2-y, 1-z       | 1.09          | 2.54  | 120     |
| Hemihydrate<br>1 | O3-H3O...N2   | x, 3/2-y, 1/2+z     | 0.99          | 1.89  | 177     |
|                  | C2-H2...O1    | .                   | 1.09          | 2.48  | 102     |
|                  | C3-H3...O1    | x, 3/2-y, -1/2+z    | 1.09          | 2.48  | 152     |
|                  | C5-H5...O1    | 1-x, 1-y, 1-z       | 1.09          | 2.60  | 133     |
|                  | C10-H10...O2  | x, y, -1+z          | 1.09          | 2.45  | 160     |
|                  | C17-H17C...O3 | .                   | 1.09          | 2.50  | 166     |
|                  | C18-H18A...O3 | 1-x, 1-y, 1-z       | 1.09          | 2.39  | 134     |
| Hemihydrate<br>2 | C2-H2...O1    |                     | 1.09          | 2.49  | 101     |
|                  | C10-H10...O2  | x, y, 1+z           | 1.09          | 2.39  | 172     |
|                  | C17-H17C...O3 | x, 1/2-y, -1/2+z    | 1.09          | 2.47  | 143     |

<sup>†</sup> F. H. Allen, O. Kennard, D. G. Watson, L. Brammer, A. G. Orpen, R. Taylor, *J. Chem. Soc. Perkin Trans. 2*, 1987, S1.

#### 5. Distance range observed in aromatic sulfone and aromatic C-H interactions in CSD analysis

To search for aromatic sulfones RSO<sub>2</sub>R' (R= Ar, R'=Me) for sulfone to aromatic C-H

interactions, the following restrictions were applied: Only organics, no errors, not disordered,

not polymeric, no ions, 3D coordinates determined. The  $S=O \cdots H-C$  distance was restricted to less than the sum of the van der Waals radii.

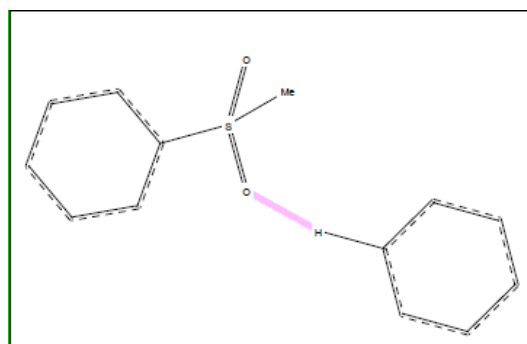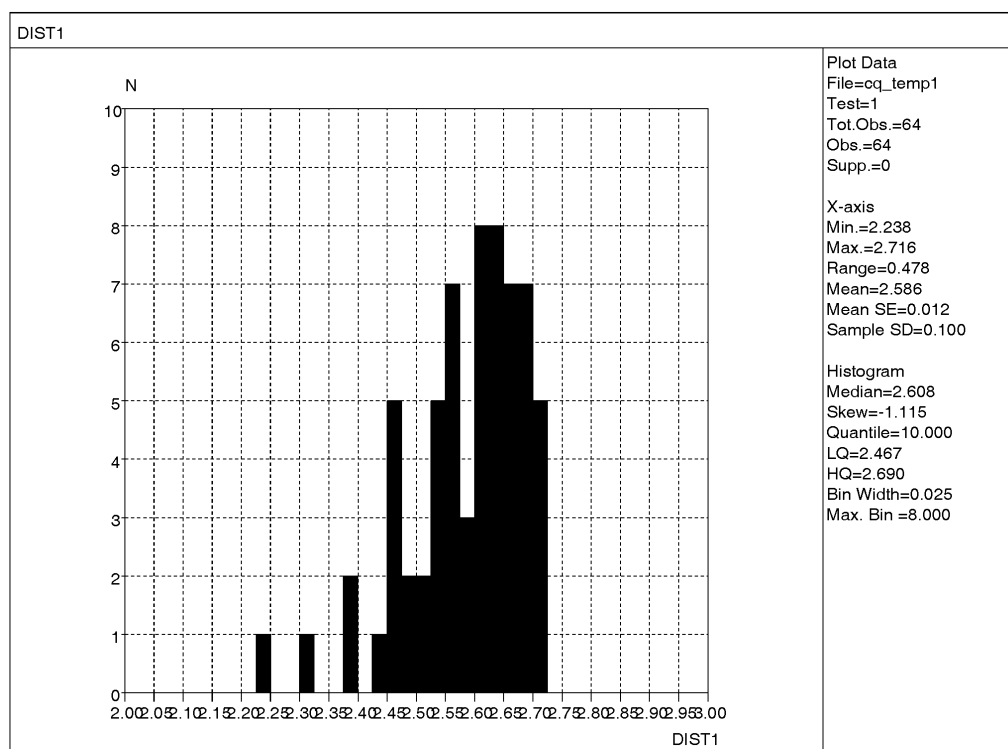

**Fig. S5.1** Distribution of  $S=O \cdots H-C$  distances as observed in aromatic sulfone ( $R=Ar$ ,  $R'=Me$ ) to aromatic  $C-H$  interaction.

## 6. Difference map for locating water hydrogen atoms in hemihydrate II

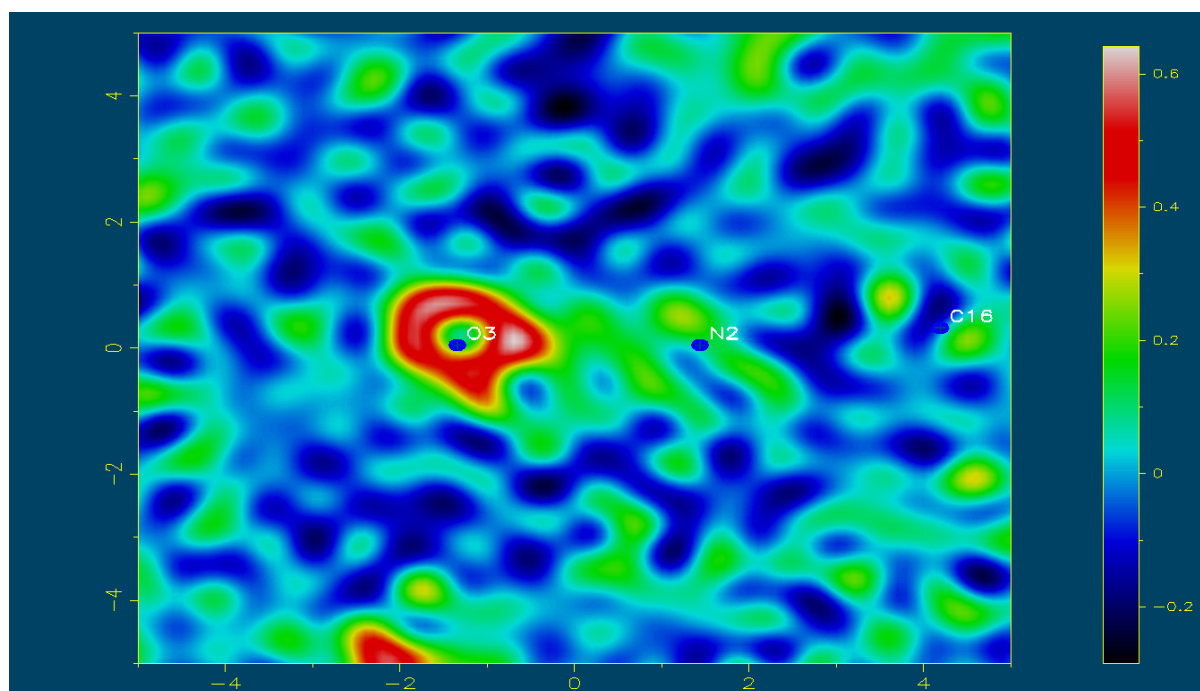

Supplement: c2ce06604a.pdf [file c2ce06604a.pdf]
